# Supplementary material for: The Status of Cardiovascular Health in Rural and Urban Areas of Janow Lubelski District in Eastern Poland: a Population-Based Study
Source: Preprints.org preprint supplement (doi:10.20944/preprints201809.0204.v1), 2018-09-12
Supplement: Supplementary file 1 [file supplementary]

# The Status of Cardiovascular Health in Rural and Urban Areas of Janów Lubelski District in Eastern Poland: a Population-Based Study

Grzegorz Józef Nowicki\*, Barbara Ślusarska, Honorata Piasecka, Agnieszka Bartoszek, Katarzyna Kocka and Alina Deluga

**Table S1.** The definition of cardiovascular health in our research (according to AHA criteria).

| Metric                       | Definition                                                                                      |
|------------------------------|-------------------------------------------------------------------------------------------------|
| <b>Behavioural component</b> |                                                                                                 |
| Smoking                      |                                                                                                 |
| Poor                         | Currently smoke (at least 1 cigarette a day or the last cigarette was burned in the last month) |
| Intermediate                 | Smoked in the past and quit smoking 1–12 months ago                                             |
| Ideal                        | Never smoked or quit smoking > 12 months ago                                                    |
| Body mass index              |                                                                                                 |
| Poor                         | ≥ 30 kg/m <sup>2</sup>                                                                          |
| Intermediate                 | 25–29.9 kg/m <sup>2</sup>                                                                       |
| Ideal                        | 18.5–24.9 kg/m <sup>2</sup>                                                                     |
| Physical activity            |                                                                                                 |
| Poor                         | < 150 minutes of physical activity / week                                                       |
| Intermediate <sup>#</sup>    | -                                                                                               |
| Ideal                        | ≥ 150 minutes of physical activity / week                                                       |
| Healthy diet score           |                                                                                                 |
| Poor                         | ≥ 12 points in the diet test                                                                    |
| Intermediate                 | 20–13 points in the diet test                                                                   |
| Ideal                        | 30–21 points in the diet test                                                                   |
| <b>Biological component</b>  |                                                                                                 |
| Total cholesterol            |                                                                                                 |
| Poor                         | ≥ 240 mg/dl                                                                                     |
| Intermediate                 | 200–239 mg/dl or < 200 mg/dl and intake of cholesterol-lowering medications                     |
| Ideal                        | < 200 mg/dl and not taking cholesterol-lowering medications                                     |
| Blood pressure               |                                                                                                 |
| Poor                         | SDP ≥ 140 mm Hg and DBP ≥ 90 mm Hg                                                              |
| Intermediate                 | SBP 121–139 and DBP 80–89 or intake of hypertensive                                             |
| Ideal                        | SBP ≤ 120 mm Hg and DBP ≤ 80 mm Hg without hypotensive treatment                                |

Table S1. *Cont.*

| Metric                      | Definition                                                           |
|-----------------------------|----------------------------------------------------------------------|
| <b>Biological component</b> |                                                                      |
| Fasting plasma glucose      |                                                                      |
| Poor                        | ≥ 126 mg/dl                                                          |
| Intermediate                | 100–125 mg/dl or > 100 mg/dl and intake of hypoglycaemic medications |
| Ideal                       | < 100 mg/dl and not taking hypoglycaemic medications                 |

<sup>a</sup>Value not taken into consideration

**Table S2.** Characteristics of the researched group according to their gender.

| Characteristics of population                             | Female |      | Male |      | P-value               |
|-----------------------------------------------------------|--------|------|------|------|-----------------------|
|                                                           | n      | %    | n    | %    |                       |
|                                                           | 2298   | 58.9 | 1603 | 41.1 |                       |
| <b>Smoking</b>                                            |        |      |      |      |                       |
| Poor                                                      | 262    | 11.4 | 358  | 22.3 | < 0.001 <sup>#</sup>  |
| Intermediate                                              | 369    | 16.1 | 451  | 28.1 | < 0.001 <sup>##</sup> |
| Ideal                                                     | 1667   | 72.5 | 794  | 49.5 |                       |
| <b>Body Mass Index</b>                                    |        |      |      |      |                       |
| Poor                                                      | 814    | 35.4 | 589  | 36.7 | < 0.001 <sup>#</sup>  |
| Intermediate                                              | 828    | 36   | 734  | 45.8 | < 0.001 <sup>##</sup> |
| Ideal                                                     | 656    | 28.5 | 280  | 17.5 |                       |
| <b>Physical Activity</b>                                  |        |      |      |      |                       |
| Poor                                                      | 1383   | 60.2 | 851  | 53.1 | < 0.001 <sup>#</sup>  |
| Intermediate                                              | -      | -    | -    | -    |                       |
| Ideal                                                     | 915    | 39.8 | 752  | 46.9 |                       |
| <b>Healthy Diet</b>                                       |        |      |      |      |                       |
| Poor                                                      | 1946   | 84.7 | 1438 | 89.7 | < 0.001 <sup>#</sup>  |
| Intermediate                                              | 166    | 7.2  | 97   | 6.1  | < 0.001 <sup>##</sup> |
| Ideal                                                     | 186    | 8.1  | 68   | 4.2  |                       |
| <b>Fasting Total Cholesterol</b>                          |        |      |      |      |                       |
| Poor                                                      | 701    | 30.5 | 453  | 28.3 | 0.2 <sup>#</sup>      |
| Intermediate                                              | 799    | 34.8 | 554  | 34.6 | 0.12 <sup>##</sup>    |
| Ideal                                                     | 798    | 34.7 | 596  | 37.2 |                       |
| <b>Blood Pressure</b>                                     |        |      |      |      |                       |
| Poor                                                      | 1010   | 44   | 1016 | 63.4 | < 0.001 <sup>#</sup>  |
| Intermediate                                              | 955    | 41.6 | 518  | 32.3 | < 0.001 <sup>##</sup> |
| Ideal                                                     | 333    | 14.5 | 69   | 4.3  |                       |
| <b>Fasting Serum Glucose</b>                              |        |      |      |      |                       |
| Poor                                                      | 192    | 8.4  | 154  | 9.6  | 0.06 <sup>#</sup>     |
| Intermediate                                              | 658    | 28.6 | 497  | 31   | 0.02 <sup>##</sup>    |
| Ideal                                                     | 1448   | 63   | 952  | 59.4 |                       |
| <b>Cardiovascular health metrics</b>                      |        |      |      |      |                       |
| Poor cardiovascular health<br>(0–2 ideal metrics)         | 1148   | 50   | 986  | 61.5 | <0.001 <sup>#</sup>   |
| Intermediate cardiovascular health (3–4 ideal<br>metrics) | 975    | 42.4 | 581  | 36.2 | < 0.001 <sup>##</sup> |
| Ideal cardiovascular health<br>(5–7 ideal metrics)        | 175    | 7.6  | 36   | 2.2  |                       |

Table S2. *Cont.*

| Characteristics of population              | Female |      | Male |      | P-value |
|--------------------------------------------|--------|------|------|------|---------|
|                                            | n      | %    | n    | %    |         |
|                                            | 2298   | 58.9 | 1603 | 41.1 |         |
| No. of ideal cardiovascular health metrics |        |      |      |      |         |
| 0                                          | 59     | 2.6  | 102  | 6.4  | <0.001  |
| 1                                          | 383    | 16.7 | 349  | 21.8 |         |
| 2                                          | 706    | 30.7 | 535  | 33.4 |         |
| 3                                          | 611    | 26.6 | 417  | 26   |         |
| 4                                          | 364    | 15.8 | 164  | 10.2 |         |
| 5                                          | 136    | 5.9  | 31   | 1.9  |         |
| 6                                          | 34     | 1.5  | 5    | 0.3  |         |
| 7                                          | 5      | 0.2  | 0    | 0    |         |

\*Ideal vs. poor vs. intermediate; \*\*Ideal vs. poor + intermediate
